# Supplementary material for: SARS-COV-2 antibody prevalence in patients on dialysis in the US in January 2021
Source: bioRxiv or medRxiv preprint supplement (doi:10.1101/2021.03.07.21252786), 2021-03-09
Supplement: Supplementary file [file media-1.pdf]

## **Supplemental Data to**

### **“SARS-COV-2 antibody prevalence in patients on dialysis in the US in January 2021”**

**Supplemental Table 1** Comparison of sampled population, US adult dialysis population, and US adult population (July US Renal sample)

**p2**

**Supplemental Table 2** Seroprevalence of SARS-CoV2 antibodies in patients receiving dialysis in the US (July US Renal population)

**p3**

**Supplemental Figure 1** Differences in seroprevalence by patient and neighborhood characteristics between July 2020 and January 2021

**p4**

**Supplemental Table 1** Comparison of sampled population, US adult dialysis population, and US adult population (July US Renal sample)

| Patient characteristics                    | US Renal<br>population July<br>2020 |    | U.S. adult<br>dialysis<br>population |    | U.S. adult<br>population |    |
|--------------------------------------------|-------------------------------------|----|--------------------------------------|----|--------------------------|----|
|                                            | N=11 746                            |    | N=499 150                            |    | N=253 815 197            |    |
|                                            | Count                               | %  | Count                                | %  | Count                    | %  |
| <b>Age</b>                                 |                                     |    |                                      |    |                          |    |
| 18-44                                      | 1304                                | 11 | 60 540                               | 12 | 117 499 477              | 46 |
| 45-64                                      | 4723                                | 40 | 207 022                              | 41 | 83 892 606               | 33 |
| 65-79                                      | 4298                                | 37 | 174 341                              | 35 | 39 949 825               | 16 |
| ≥80                                        | 1421                                | 12 | 57 247                               | 11 | 12 473 289               | 5  |
| <b>Sex</b>                                 |                                     |    |                                      |    |                          |    |
| Men                                        | 6634                                | 56 | 285 281                              | 57 | 123 578 869              | 49 |
| Women                                      | 5112                                | 44 | 213 869                              | 43 | 130 236 328              | 51 |
| <b>Race and Ethnicity**</b>                |                                     |    |                                      |    |                          |    |
| Hispanic                                   | 1902                                | 18 | 87 611                               | 18 | 60 861 275               | 19 |
| Non-Hispanic white                         | 4226                                | 39 | 203 421                              | 41 | 197 202 727              | 60 |
| Non-Hispanic Black                         | 3042                                | 28 | 173 190                              | 35 | 39 717 152               | 12 |
| Non-Hispanic Other                         | 1672                                | 15 | 34 928                               | 7  | 28 493 202               | 9  |
| <b>ZCTA Majority Race and Ethnicity*^+</b> |                                     |    |                                      |    |                          |    |
| Non-Hispanic white                         | 3538                                | 30 | 206 678                              | 41 | 189 968 192              | 58 |
| Non-Hispanic Black                         | 848                                 | 7  | 54 999                               | 11 | 12 550 083               | 4  |
| Hispanic                                   | 2250                                | 19 | 52 953                               | 11 | 26 310 796               | 8  |
| Hispanic and Black                         | 1282                                | 11 | 43 396                               | 9  | 17 238 911               | 5  |
| Integrated                                 | 3828                                | 33 | 140 781                              | 28 | 80 206 374               | 25 |
| <b>Region</b>                              |                                     |    |                                      |    |                          |    |
| Northeast                                  | 1172                                | 10 | 78 619                               | 16 | 44 519 465               | 18 |
| South                                      | 5926                                | 51 | 214 974                              | 43 | 96 250 597               | 38 |
| Midwest                                    | 1072                                | 9  | 94 490                               | 19 | 52 876 708               | 21 |
| West                                       | 3576                                | 30 | 111 067                              | 22 | 60 168 427               | 24 |

U.S. adult population in 2018, U.S. adult patients on dialysis population as of January 1 2017.

\*Race, ethnicity, and ZCTA Majority Race and Ethnicity computed for total U.S. 2018 population N=326,274,356. &Proportions are reported for persons with available data; 904 (7.7%) in the sample were missing race and ethnicity.

^343 and 583 people in the U.S. Renal Data System and sample populations missing data on ZCTA Majority Race/Ethnicity due to missing zip code respectively. +ZCTA Majority defined as population in ZCTA ≥ 60% Hispanic, Non-Hispanic Black, or Non Hispanic White; if in remainder ZCTAs Hispanic and Black population exceeded ≥60%, ZCTA defined as ‘Hispanic and Black’, else as ‘Other’.

Abbreviations: ZCTA-zip code tabulation area

**Supplemental Table 2** Seroprevalence of SARS-CoV-2 antibodies in patients receiving dialysis in the US (July US Renal population)

|                                            | Unweighted sample<br>(US Renal population<br>July 2020) |                | Standardized<br>to US adult<br>dialysis<br>population <sup>#</sup> | Standardized to<br>US adult<br>population <sup>&amp;</sup> | Seropositive<br>persons per<br>100,000 <sup>Ω</sup> |
|--------------------------------------------|---------------------------------------------------------|----------------|--------------------------------------------------------------------|------------------------------------------------------------|-----------------------------------------------------|
|                                            | Count                                                   | Seropositive % | Seropositive %                                                     | Seropositive %                                             |                                                     |
| <b>Age**</b>                               |                                                         |                |                                                                    |                                                            |                                                     |
| 18-44                                      | 74                                                      | 5.7 (4.4, 6.9) | 6.1 (4.5, 7.7)                                                     | 6.1 (4.5, 7.7)                                             | 5857                                                |
| 45-64                                      | 231                                                     | 4.9 (4.3, 5.5) | 5.3 (4.5, 6)                                                       | 5.3 (4.5, 6)                                               | 5230                                                |
| 65-79                                      | 163                                                     | 3.8 (3.2, 4.4) | 4.2 (3.5, 4.9)                                                     | 4.2 (3.5, 4.9)                                             | 4162                                                |
| ≥80                                        | 51                                                      | 3.6 (2.6, 4.6) | 4.1 (2.8 5.3)                                                      | 4.1 (2.8 5.3)                                              | 3984                                                |
| <b>Sex*</b>                                |                                                         |                |                                                                    |                                                            |                                                     |
| M                                          | 285                                                     | 4.3 (3.8, 4.8) | 5.3 (4.3, 6.3)                                                     | 5.3 (4.3, 6.3)                                             | 5025                                                |
| F                                          | 234                                                     | 4.6 (4, 5.2)   | 5.5 (4.4, 6.7)                                                     | 5.5 (4.4, 6.7)                                             | 5544                                                |
| <b>Race and Ethnicity**</b>                |                                                         |                |                                                                    |                                                            |                                                     |
| Hispanic                                   | 120                                                     | 6.3 (5.2, 7.4) | 6.9 (5.7, 8.2)                                                     | 8.0 (5.8, 10.1)                                            | 5050                                                |
| Non-Hispanic white                         | 116                                                     | 2.7 (2.3, 3.2) | 3 (2.4, 3.5)                                                       | 3.7 (2.6, 4.8)                                             | 1613                                                |
| Non-Hispanic Black                         | 184                                                     | 6 (5.2, 6.9)   | 6.4 (5.5, 7.4)                                                     | 6.7 (5, 8.4)                                               | 12367                                               |
| Other                                      | 34                                                      | 2 (1.4, 2.7)   | 2.6 (1.7, 3.6)                                                     | 2.4 (1.2, 3.5)                                             | 2492                                                |
| <b>ZCTA Majority Race and Ethnicity***</b> |                                                         |                |                                                                    |                                                            |                                                     |
| Hispanic                                   | 126                                                     | 5.6 (4.7, 6.6) | 6.4 (5.2, 7.5)                                                     | 8.0 (5.9, 10.0)                                            | 12308                                               |
| Non-Hispanic white                         | 102                                                     | 2.9 (2.3, 3.4) | 3 (2.4, 3.7)                                                       | 3.2 (2.1, 4.2)                                             | 1440                                                |
| Non-Hispanic Black                         | 68                                                      | 8 (6.2, 9.8)   | 8.8 (6.6, 11)                                                      | 10.1 (5.8, 14.3)                                           | 16742                                               |
| Hispanic and Black                         | 79                                                      | 6.2 (4.8, 7.5) | 6.4(5.7.9)                                                         | 7.0 (4.7, 9.2)                                             | 10616                                               |
| Integrated                                 | 144                                                     | 3.8 (3.2, 4.4) | 4.3(3.6 5)                                                         | 4.7 (3.4, 6.1)                                             | 4395                                                |
| <b>Region**</b>                            |                                                         |                |                                                                    |                                                            |                                                     |
| Northeast                                  | 97                                                      | 8.3 (6.7, 9.9) | 8.4 (6.8, 10)                                                      | 9.4 (6.6, 12.3)                                            | 9594                                                |
| South                                      | 242                                                     | 4.1 (3.6, 4.6) | 4.1 (3.6, 4.6)                                                     | 4.9 (4.1, 5.8)                                             | 4786                                                |
| Midwest                                    | 43                                                      | 4 (2.8, 5.2)   | 4 (2.8, 5.2)                                                       | 4.2 (2.3, 6)                                               | 3891                                                |
| West                                       | 137                                                     | 3.8 (3.2, 4.5) | 3.9 (3.2, 4.5)                                                     | 4.1 (3.1, 5.2)                                             | 4144                                                |
| <b>ZCTA poverty level <sup>###</sup></b>   |                                                         |                |                                                                    |                                                            |                                                     |
| <10                                        | 104                                                     | 3.4 (2.7, 4)   | 3.6 (2.9, 4.4)                                                     | 3.5 (2.3, 4.7)                                             | 1829                                                |
| 10 to <20%                                 | 177                                                     | 4 (3.4, 4.6)   | 4.4 (3.7, 5.1)                                                     | 5.6 (4.3, 7)                                               | 4390                                                |
| 20 to <30%                                 | 132                                                     | 4.9 (4.1, 5.7) | 5.3 (4.4, 6.3)                                                     | 5.9 (4.2, 7.5)                                             | 6404                                                |
| ≥30%                                       | 105                                                     | 7 (5.7, 8.3)   | 7.2 (5.8, 8.6)                                                     | 7.8 (5.5, 10)                                              | 11691                                               |
| <b>ZCTA rural or urban status</b>          |                                                         |                |                                                                    |                                                            |                                                     |
| Dense urban                                | 466                                                     | 4.8 (4.4, 5.2) | 5.3 (4.8, 5.8)                                                     | 6.1 (5.2, 7.0)                                             | 5123                                                |
| Metropolitan                               | 16                                                      | 1.8 (0.9, 2.7) | 1.6 (0.8, 2.4)                                                     | 1.3 (0.4, 2.3)                                             | 825                                                 |
| Micropolitan                               | 19                                                      | 3.2 (1.8, 4.6) | 2.9 (1.5, 4.3)                                                     | 2.5 (1.0, 4.0)                                             | 1101                                                |
| Small town or rural                        | 17                                                      | 3.2 (1.7, 4.7) | 2.4 (1.3, 3.6)                                                     | 2.1 (0.7, 3.6)                                             | 991                                                 |
| <b>Overall</b>                             | 519                                                     | 4.4 (4.0, 4.8) | 4.7 (4.3, 5.2)                                                     | 5.4 (4.6, 6.2)                                             | 5291                                                |

\*different at  $p < 0.05$ , \*\* different at  $p < 0.0001$  for the sample population #Standardized to the U.S. dialysis population using all adults receiving dialysis for the treatment of end stage kidney disease on Jan 1<sup>st</sup>, 2017 identified through the United States Renal Data System database (N= 499 150). <sup>&</sup>Standardized to the US population using ACS 2018 data <sup>Ω</sup>Seropositivity per 100 000 persons calculated as standardized count/category n X 100 000. \*ZCTA Majority defined if population in ZCTA ≥ 60% Hispanic, Non-Hispanic Black, or Non-Hispanic white; if in remainder ZCTAs Hispanic and Black population exceeded ≥60%, ZCTA defined as 'Hispanic and Black', else as 'Other'.

**Supplemental Figure 1** Odds of SARS-CoV-2 seroprevalence by neighborhood and patient characteristics in January 2021, with comparison to July 2020

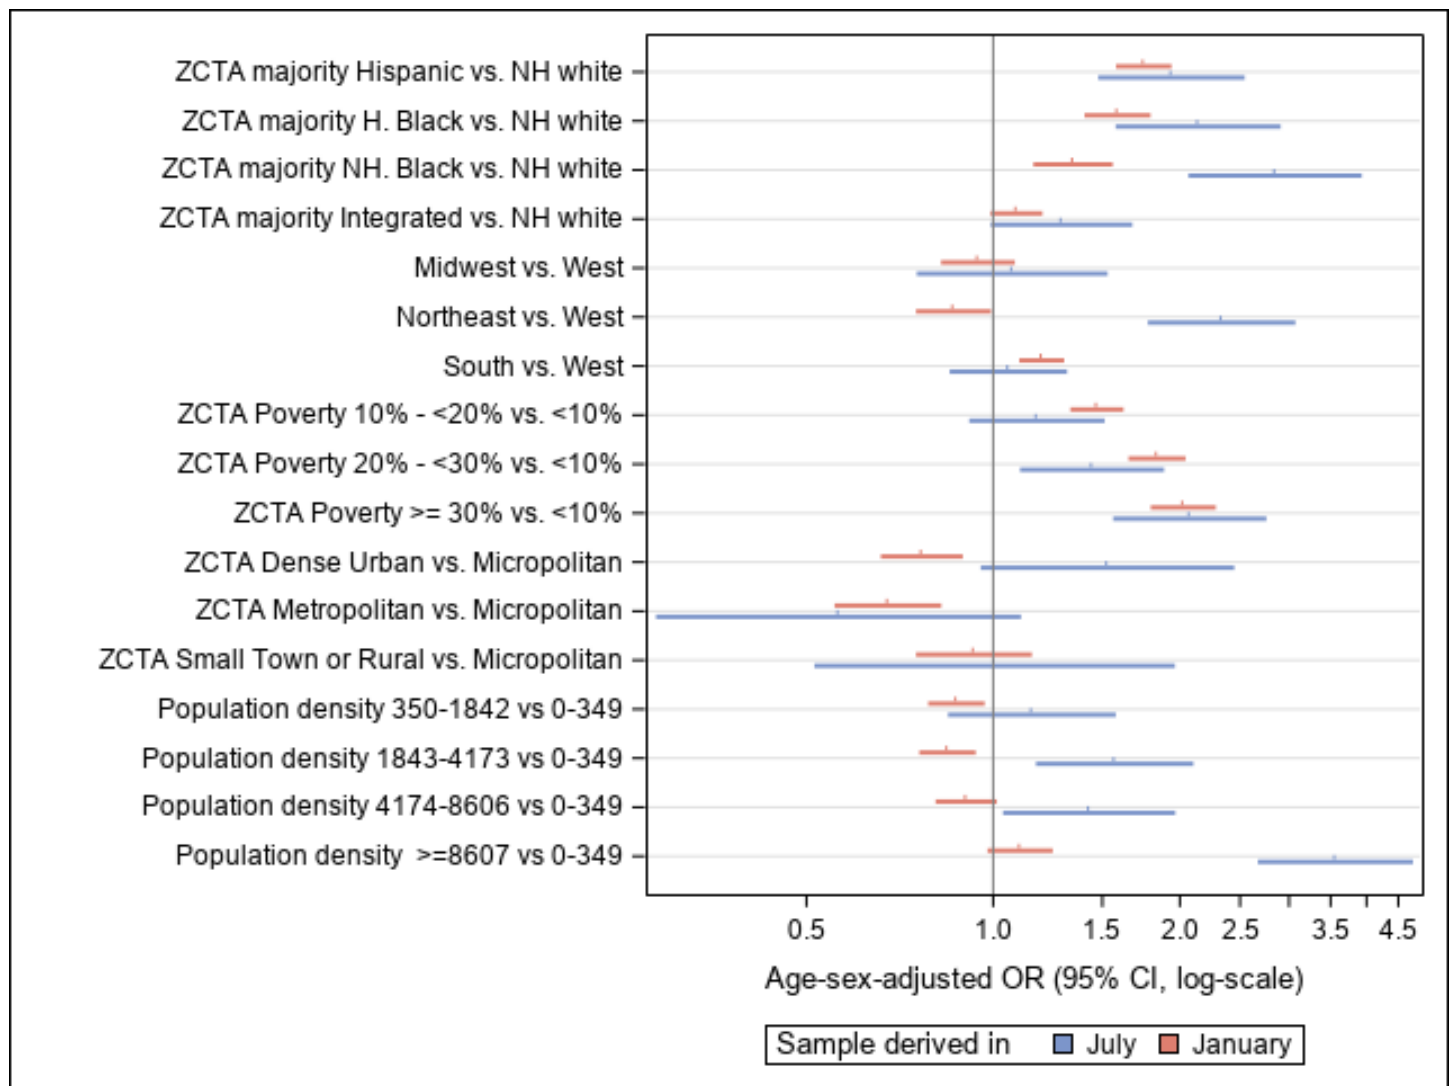

Compared with July data, the differences in seroprevalence by region, population density, and urban-rural status diminished. Persons living in majority Hispanic neighborhoods had higher odds of SARS-CoV-2 seroprevalence compared with persons living in majority white neighborhoods: OR 1.7 (95%CI 1.6, 1.9) in January 2021 versus OR 1.9 (95% CI: 1.5, 2.5) in July 2020. Persons living in majority Non Hispanic Black neighborhoods however had narrower differences in odds of seroprevalence compared with persons living in majority white neighborhoods: OR 1.3 (95% CI: 1.2, 1.6) in January 2021 versus OR 2.8 (95% CI 2.8, 3.9) in July 2020.

The differences by geographic region narrowed. The largest regional difference observed was 1.2 (95% CI: 1.1, 1.3) higher odds of seroprevalence in residents of the South versus West in January 2021, versus in July 2020 there was a 2.3 (1.8, 3.0) higher odds of seroprevalence in residents of the Northeast versus West. Persons living neighborhoods where  $\geq 30\%$  of residents had incomes below the federal poverty threshold still higher odds of SARS-CoV-2 seroprevalence: OR 2.0 (95% CI: 1.8, 2.3) in January 2021 versus OR 2.1 (95% CI: 1.6, 2.7) in July 2020.
